# Supplementary material
Source: PubMed Central journal article supplement (PMC3306696)
Supplement: 1114981109_pnas.201114981SI.pdf [file 1114981109_pnas.201114981SI.pdf]

# Supporting Information

Liu et al. 10.1073/pnas.1114981109

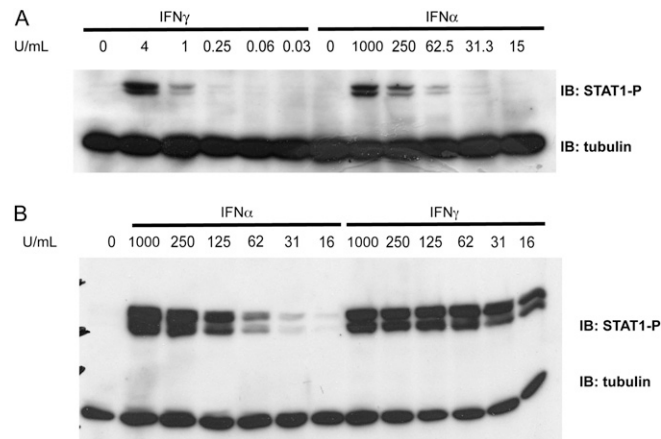

**Fig. S1.** (A) Bone marrow-derived macrophages were treated with IFN $\alpha$  and IFN $\gamma$  at the indicated concentrations for 30 min and the cell lysates were subjected to immunoblotting (IB) for phospho-STAT1 and tubulin, which is a housekeeping gene. (B) Similar to A. Higher titrations of IFN $\alpha$  and IFN $\gamma$  were used.

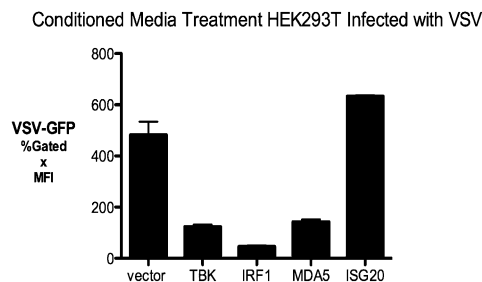

**Fig. S2.** Conditioned media from HEK293T cells overexpressing the indicated gene were used to treat freshly plated HEK293T cells. The cells were infected with vesicular stomatitis virus (VSV)-GFP 4 h after treatment, and VSV-GFP was measured by FACS. Values are represented as mean  $\pm$  SEM. MFI, geometric mean of fluorescence index.

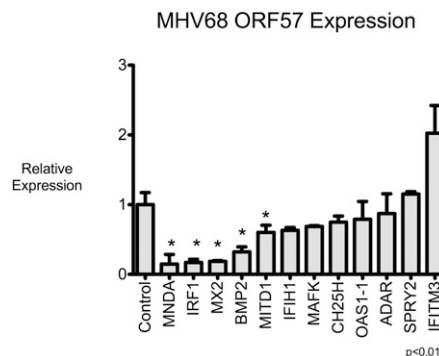

**Fig. S3.** HEK293T cells were transfected with selected IFN-stimulated genes (ISGs) that inhibited murine gammaherpes virus (MHV)-68 replication. Expression of MHV-68 ORF57 was measured by quantitative PCR at 4 h postinfection (hpi). Values are represented as mean  $\pm$  SEM.

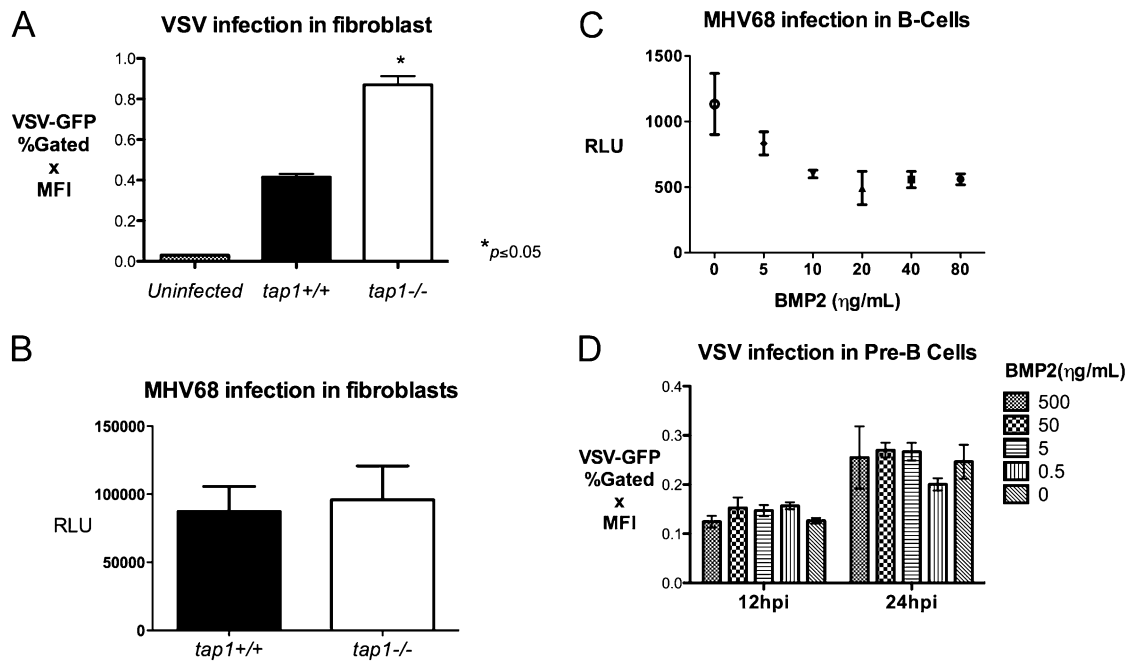

**Fig. 54.** (A)  $TAP^{+/+}$  and  $TAP^{-/-}$  tail-derived fibroblasts were infected with VSV-GFP at 0.1 MOI, and VSV-GFP was measured by FACS at 12 hpi. MFI, geometric mean fluorescence index. (B)  $TAP^{+/+}$  and  $TAP^{-/-}$  fibroblasts were infected the MHV-68 at 0.25 MOI, and MHV-68-Luc activity was measured at 9 hpi. (C) Immortalized pre-B cells were treated with hBMP2 at indicated concentration for 12 h and infected with MHV-68-Luc at 0.25 MOI. Luciferase activity in the cell lysates was quantified at 9 hpi. Values represent mean  $\pm$  SD. (D) HEK293T and Pre-B cells treated with BMP2 at increasing concentrations for 12 h and infected with VSV at 0.01 and 1MOI respectively. VSV-GFP expression was measured by FACS at 9 hpi. Values represent mean  $\pm$  SD.

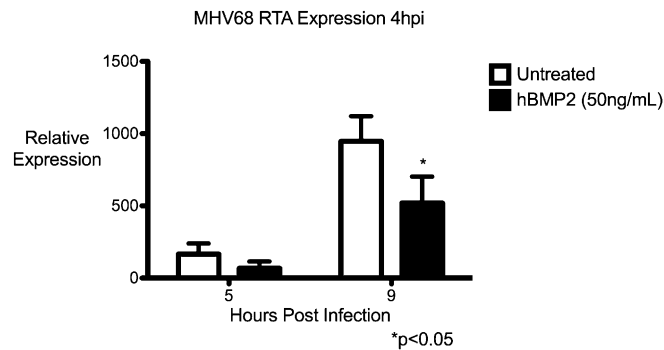

**Fig. 55.** HEK293T cells were treated with recombinant human BMP2 (hBMP2) at 50 ng/mL for 12 h and infected with 0.2 multiplicity of infection (MOI) of MHV-68. Expression of replication and transactivator protein (RTA) was measured at 4 hpi.

**Table S1.** List of IFN $\alpha$ -specific, IFN $\gamma$  specific, and commonly induced ISGs described in Fig. 1

[Table S1 \(DOCX\)](#)

**Table S2.** List of all ISGs that inhibited VSV-GFP replication when expressed with red fluorescent construct (DsRed) in HEK293T cells as measured by FACS

[Table S2 \(DOCX\)](#)

VSV-GFP was measured in DsRed<sup>+</sup> cells and normalized to control transfected cells.

**Table S3. Summary of selected 24 antiviral ISGs that inhibited VSV-GFP by FACS**[Table S3 \(DOCX\)](#)

Significant inhibitory effects observed by plaque assay and VSV-G-Luc-pseudotyped virus as shown in Figs. 4A and 5A, respectively, are indicated by (+) for inhibition and (–) for no inhibition.

**Table S4. List of all ISGs that inhibited MHV-68 luciferase activity when expressed in HEK293T cells**[Table S4 \(DOCX\)](#)**Table S5. Summary of selected 12 antiviral ISGs that inhibited MHV-68 luciferase and plaque assay**[Table S5 \(DOCX\)](#)

Significant inhibitory effects by MHV-68 plaque assay or RTA expression as shown in Figs. 4B and 5B, respectively, are indicated by (+) for inhibition and (–) for no inhibition.
